# Supplementary material for: Release mode of large and small dense-core vesicles specified by different synaptotagmin isoforms in PC12 cells
Source: PubMed Central journal article supplement — Mol Biol Cell. 2011 Jul 1;22(13):2324–36. doi: 10.1091/mbc.E11-02-0159 (PMC3128534; doi:10.1091/mbc.e11-02-0159), 2011-07-01

Fig S1. Shapes of amperometric spikes triggered by  $\text{Ca}^{2+}$ ,  $\text{Sr}^{2+}$  or  $\text{Ba}^{2+}$ . **A-C**. Spikes triggered by  $\text{Ca}^{2+}$  had faster rise times and decay times, and shorter half-widths. Spikes triggered by  $\text{Ba}^{2+}$  had the slowest rise times and decay times, and longer half-widths. Spikes triggered by  $\text{Sr}^{2+}$  were intermediate. **D**. Peak heights were the same for spikes triggered by the three cations. **E-F**. Pre-spike feet (fusion pore openings) in exocytotic events triggered by  $\text{Ca}^{2+}$  were less stable and had the same amplitudes as exocytotic events triggered by  $\text{Sr}^{2+}$  or  $\text{Ba}^{2+}$ . 320 - 1083 spikes were recorded from 62 - 80 cells for each divalent cation. Error bars represent S.E.M. \*,  $P < 0.05$ ; \*\*\*,  $P < 0.001$ .

Movie S1. Exocytosis of syt I-pHluorin labeled DCVs triggered by  $\text{Ca}^{2+}$ .

Movie S2. Exocytosis of syt VII-pHluorin labeled DCVs triggered by  $\text{Ca}^{2+}$ .

Fig S1

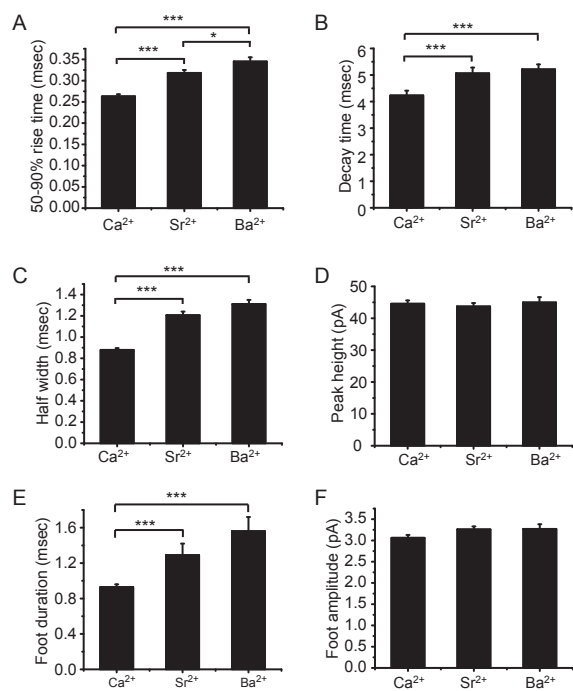

Supplement: E11-02-0159_1.pdf [file E11-02-0159_1.pdf]
